# Supplementary material
Source: publisher site journal article supplement (http://static.cambridge.org/content/id/urn:cambridge.org:id:article:S0899823X20002160/resource/name/S0899823X20002160supp001.docx)
Supplement: Supplementary file 1 [file S0899823X20002160supp001.docx]

**Supplementary Appendix 1. Antimicrobial Stewardship Worksheet Blank Template**

**Antimicrobial Stewardship Worksheet**

**Patient Case Identifier:** **AGE**: **Sex**: **Length of Stay:**

**Allergies**:

**Readmission Risk %:**

**Diabetic? (Y/N)**:

**PMH:**

**Infectious Diagnosis**:

**CC/Comments on clinical course:**

**CrCl:**

**Vital Signs:**

**Temp Trend:**

**ASP Intervention this admission?**

**Antimicrobials received this admission:**

**Steroids received this admission:**

**Antimicrobials Prescribed on Discharge:**

| **Recent Labs – Shows over past 3 days** | |
| --- | --- |
|  | Date/Time |
| WBC |  |
| HGB |  |
| PLT |  |

| **Recent Labs** | |
| --- | --- |
|  | Date/Time |
| BUN |  |
| CREATININE |  |

| **Lab Results** | | | |
| --- | --- | --- | --- |
| Component | | Value | Date |
|  | PROCAL |  |  |

**Culture Data:**

**Imaging Data:**

**Other Pertinent Labs/Procedures (i.e. EKG for QTc):**

**Appropriate? (Y/N):**

**Recommendation:**

**Supplementary Appendix 2. Factors Considered in Readmission Risk Score Tool**

| Number of active Rx orders | Imaging order is present in last 6 months | Latest calcium is low |
| --- | --- | --- |
| Number of hospitalizations in last year | Latest hemoglobin is low | Latest creatinine is high |
| Number of ED visits in last six months | Charleston Comorbidity Index | Phosphorous result is present |
| ECG/EKG order is present in last 6 months | Active anticoagulant Rx order is present | Active NSAID Rx order is present |
| Latest BUN is high | Active corticosteroid Rx order is present | Active antipsychotic |
| Encounter of ten days or longer in last year is present | Age | Diagnosis of cancer is present |
| Diagnosis of electrolyte disorder is present | Future appointment is scheduled | Diagnosis of deficiency anemia |
| Restraint order is present in last 6 months | Current length of stay | Diagnosis of renal failure |
| Latest INR is high | Active ulcer medication Rx order is present | Diagnosis of drug abuse |

Readmission Risk Score is a tool present within the institution’s electronic medical record to estimate the unplanned risk for readmission within the next 30 days. The factors listed above are taken into account in the model for risk score calculation. A score greater than or equal to 14% was considered to be high risk for readmission, 10 to 13% is medium risk, and less than 10% is low risk.
